# Supplementary material for: Comparing Zwitterionic and PEG Exteriors of Polyelectrolyte Complex Micelles
Source: MDPI journal article supplement (doi:10.3390/molecules25112553), 2020-05-30
Supplement: s1 [file s1]

# Comparing Zwitterionic and PEG Exteriors of Polyelectrolyte Complex Micelles

Jeffrey M. Ting <sup>1,2,†</sup>, Alexander E. Marras <sup>1,2,†</sup>, Joseph D. Mitchell <sup>1</sup>, Trinity R. Campagna <sup>1</sup> and Matthew V. Tirrell <sup>1,2,\*</sup>

<sup>1</sup> Pritzker School of Molecular Engineering, University of Chicago, Chicago, IL 60637, USA, jting1@uchicago.edu (J.M.T.); marras@uchicago.edu (A.E.M.); jdm41297@gmail.com (J.D.M.); trinityc@uchicago.edu (T.R.C.); mtirrell@uchicago.edu (M.V.T.)

<sup>2</sup> Center for Molecular Engineering and Materials Science Division, Argonne National Laboratory, Lemont, IL 60439, USA.

† These authors contributed equally to this work.

## Contents

- S1. Supplemental Polymer Synthesis Data (Figures S1 to S8)
- S2. Supplemental Dynamic Light Scattering Data (Figures S9 to S39)
- S3. Supplemental Small-Angle X-Ray Scattering Data (Figures S40 to S46, Table S1)
- S4. Supplemental Polyelectrolyte Complex Micelle Stability Data (Figure S47)

## S1. Supplemental Polymer Synthesis Data

**PMPC-PVBTMA Synthesis.** Figure S-1 shows a representative crude <sup>1</sup>H NMR of PMPC, resulting in 81% total monomer conversion after 18 h. Figure S-2 shows a representative crude <sup>1</sup>H NMR of PMPC-PVBTMA, resulting in 93% total monomer conversion after 18 h. Figure S-3 shows the purified <sup>1</sup>H NMR of PMPC<sub>5K</sub>-PVBTMA<sub>50</sub>.

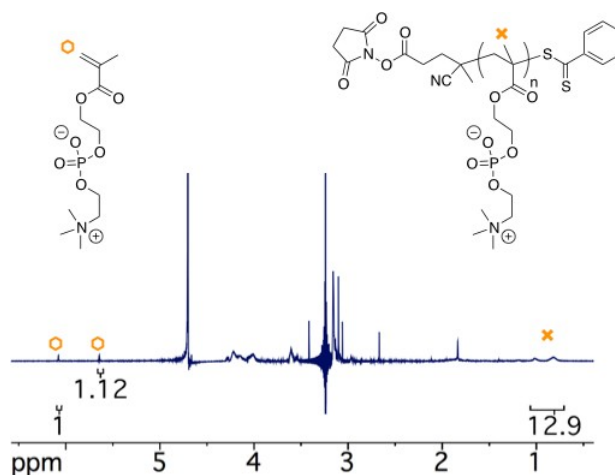

**Figure S1.** Crude <sup>1</sup>H NMR of PMPC in D<sub>2</sub>O.

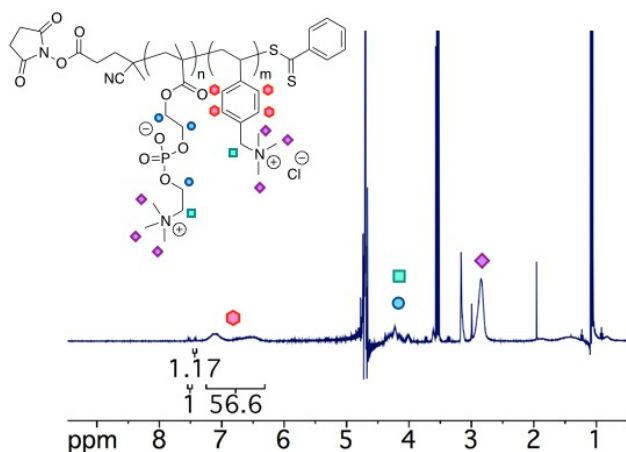

Figure S2. Crude  $^1\text{H}$  NMR of PMPC-PVBTMA in  $\text{D}_2\text{O}$ .

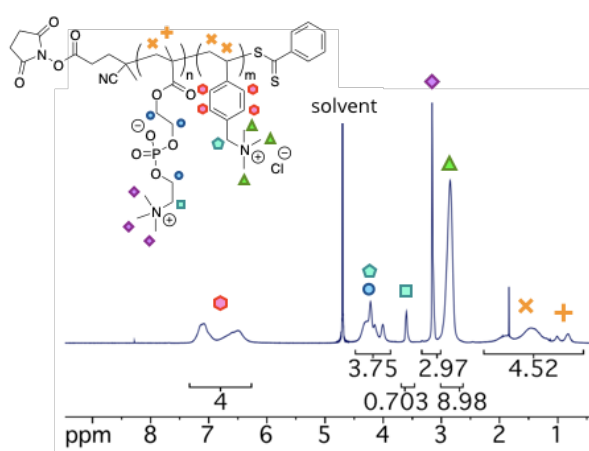

Figure S3.  $^1\text{H}$  NMR of PMPC<sub>5K</sub>-PVBTMA<sub>50</sub> in  $\text{D}_2\text{O}$ .

**PAA Synthesis.** Figures S-4 and S-5 show the  $^1\text{H}$  NMR of the BuPA RAFT CTA and the homopolymer PAA prepared with aqueous RAFT polymerization, respectively. End-group analysis ( $51 \times 94.04 \text{ g/mol} + 238.39 \text{ g/mol}$ ) resulted in a calculated  $M_n = 5030 \text{ g/mol}$ , in excellent agreement with SEC-MALS characterization. Figure S-6 shows the SEC refractive index trace of PAA, which consists of a monomodal peak exhibiting narrow dispersity in the  $M_n$  distribution.

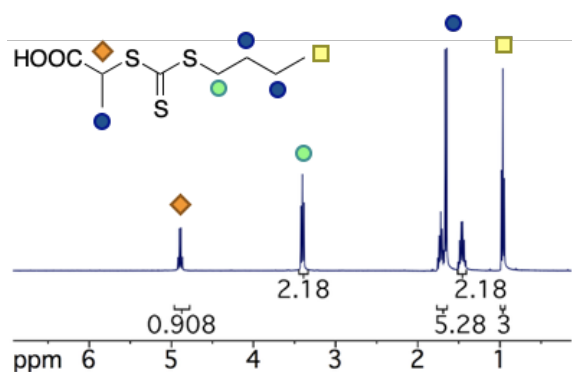

Figure S4.  $^1\text{H}$  NMR of BuPA in  $\text{CDCl}_3$ .

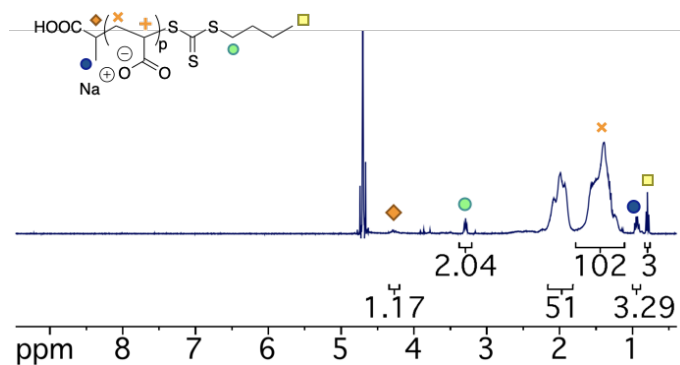Figure S5.  $^1\text{H}$  NMR of PAA in  $\text{D}_2\text{O}$ .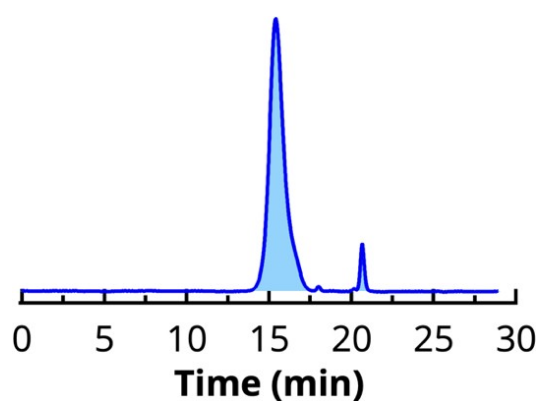Figure S6. SEC refractive index trace of PAA ( $M_n = 4900$  g/mol,  $D = 1.11$ ).

*Refractive Index Measurements.* To determine the absolute  $M_n$  of the polymers measured by SEC-MALS, we employed a refractometer to measure the  $dn/dc$  of polymers in their respective mobile phase. For PMPC-PVBTMA samples, Figure S-7 shows the  $dn/dc$  determination of the individual homopolymers. Using Equation 1 shown in the main manuscript, we calculated the  $dn/dc$  of the PMPC<sub>5K</sub>-PVBTMA<sub>50</sub> and PMPC<sub>10K</sub>-PVBTMA<sub>100</sub> to be 0.1661 and 0.1663 mL/g, respectively.

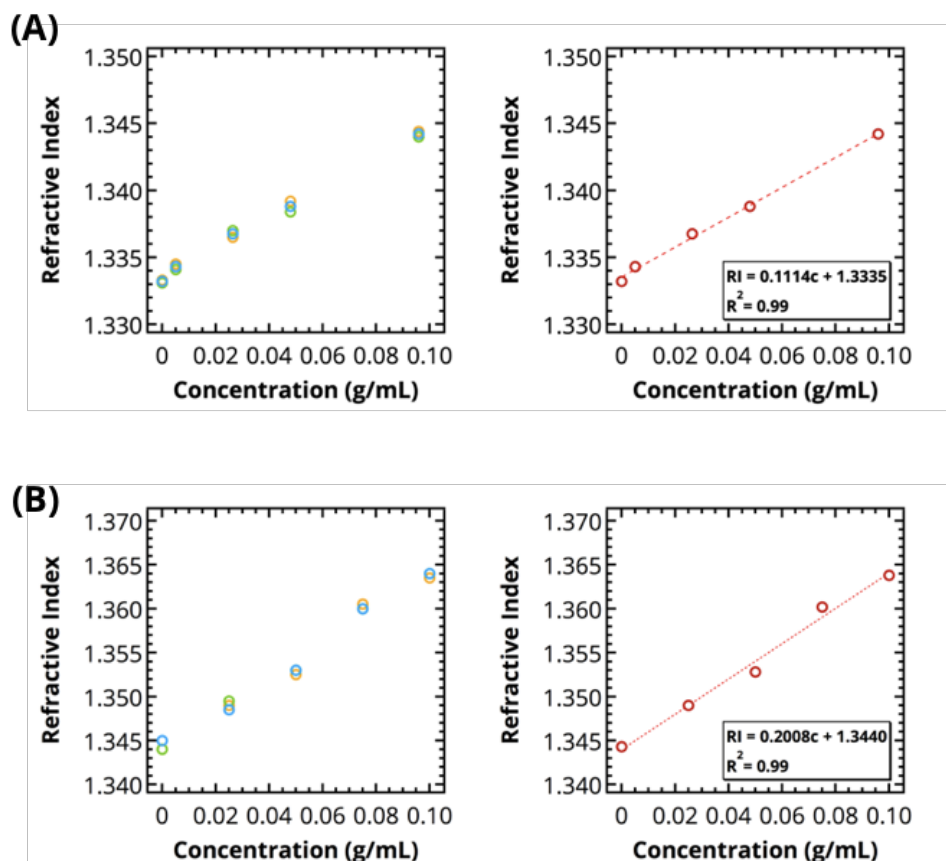

**Figure S7.** Measured refractive index values versus polymer concentration of (A) PMPC and (B) PVBtMA. All measurements were taken using polymers completely dissolved in the cationic mobile phase solution at 25 °C. The circles on the left plot show the raw data; the circles on the right plot show the average of triplicate measurements with the dashed line denoting a linear regression to determine  $dn/dc$ .

*Thermogravimetric Analysis Curves.* Figure S-8 shows the TGA profiles of synthesized polyelectrolytes. All experiments were conducted at 15 °C/min.

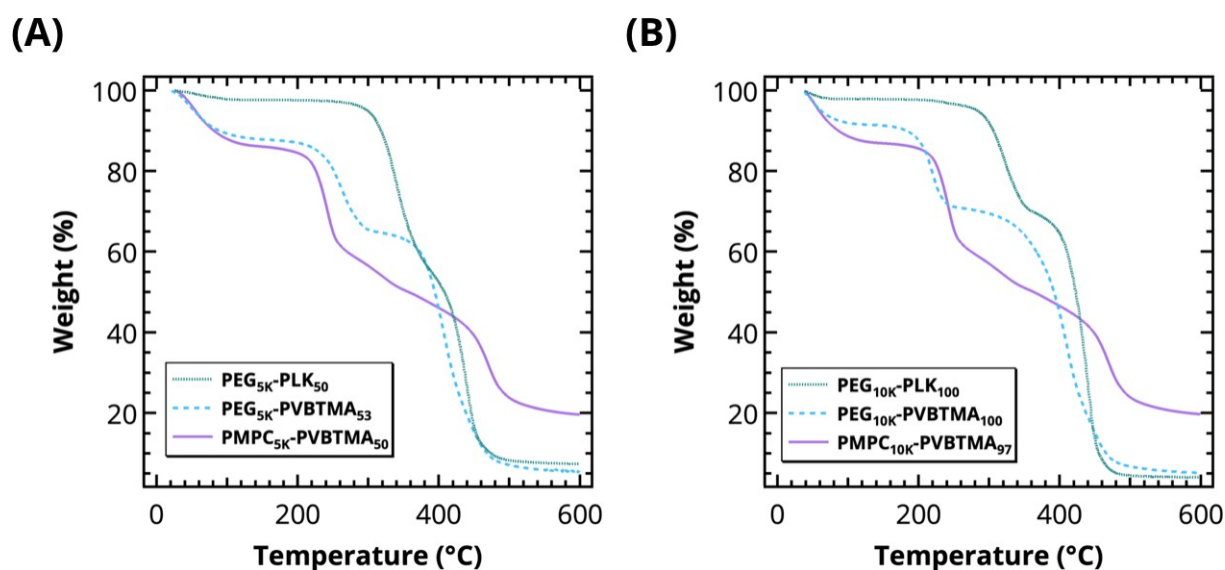

**Figure S8.** TGA curves for block polymers (A) PEG<sub>5K</sub>-PLK<sub>50</sub>, PEG<sub>5K</sub>-PVBtMA<sub>53</sub> and PMPC<sub>5K</sub>-PVBtMA<sub>50</sub>, as well as (B) PEG<sub>10K</sub>-PLK<sub>100</sub>, PEG<sub>10K</sub>-PVBtMA<sub>100</sub> and PMPC<sub>10K</sub>-PVBtMA<sub>97</sub>. All experiments were conducted at 15 °C/min.

## S2. Supplemental Dynamic Light Scattering Data

Figure S-9 shows a gallery of histograms for all prepared PCMs from 0-mM NaCl to 200-mM NaCl. The autocorrelation functions for these samples are shown in Figures S35 through S38 below.

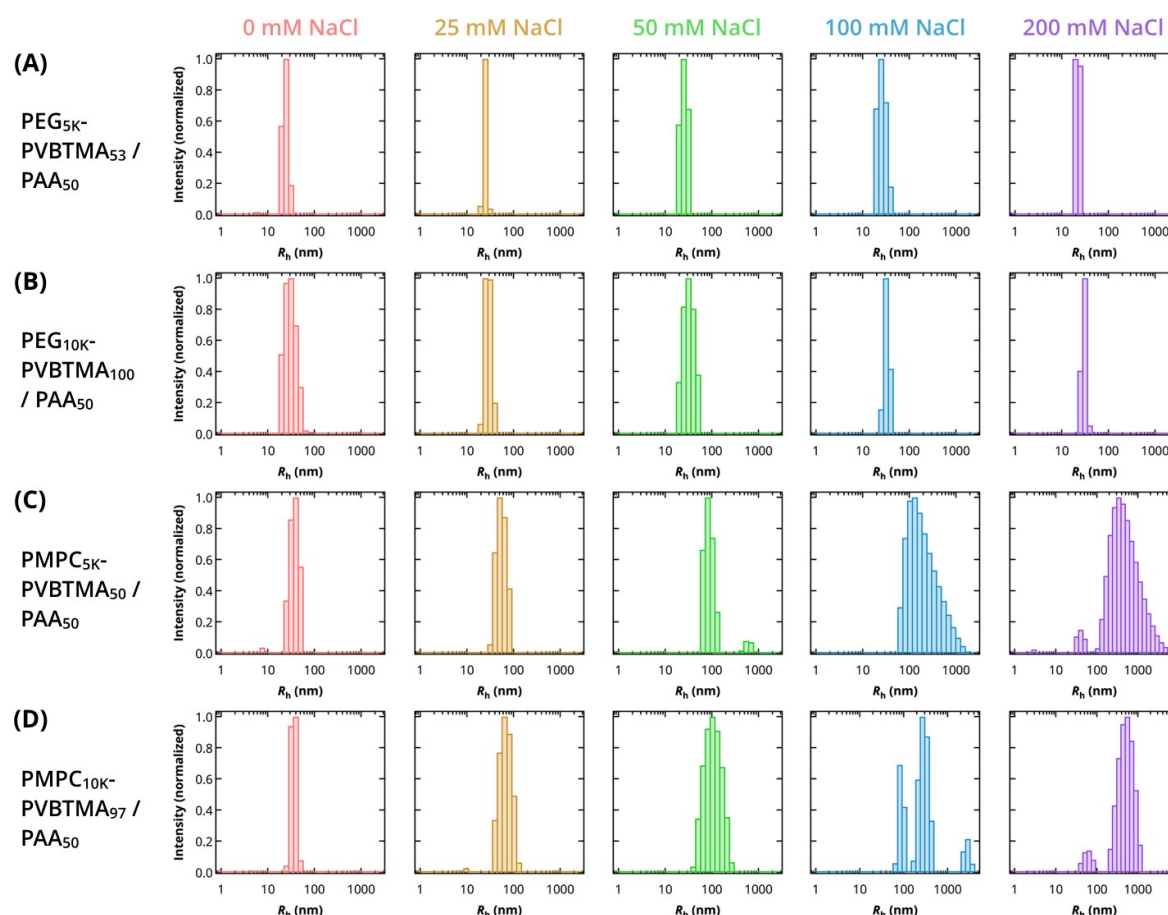

**Figure S9.** Apparent size hydrodynamic radius distribution of (A) PEG<sub>5K</sub>-PVBtMA<sub>53</sub> / PAA<sub>50</sub>, (B) PEG<sub>10K</sub>-PVBtMA<sub>100</sub> / PAA<sub>50</sub>, (C) PMPC<sub>5K</sub>-PVBtMA<sub>50</sub> / PAA<sub>50</sub> and (D) PMPC<sub>10K</sub>-PVBtMA<sub>97</sub> / PAA<sub>50</sub> as NaCl salt is increased from 0 mM to 200-mM (left to right).

The detailed multi-angle DLS analysis of the PCMs is provided below. For each polymer system, Figures S10 through S33 show the measured angular dependence of the autocorrelation functions between 60° and 120° fitted by a cumulant expansion, as well as the linear regression of  $\Gamma$  vs  $q^2$  between 60° and 120°.

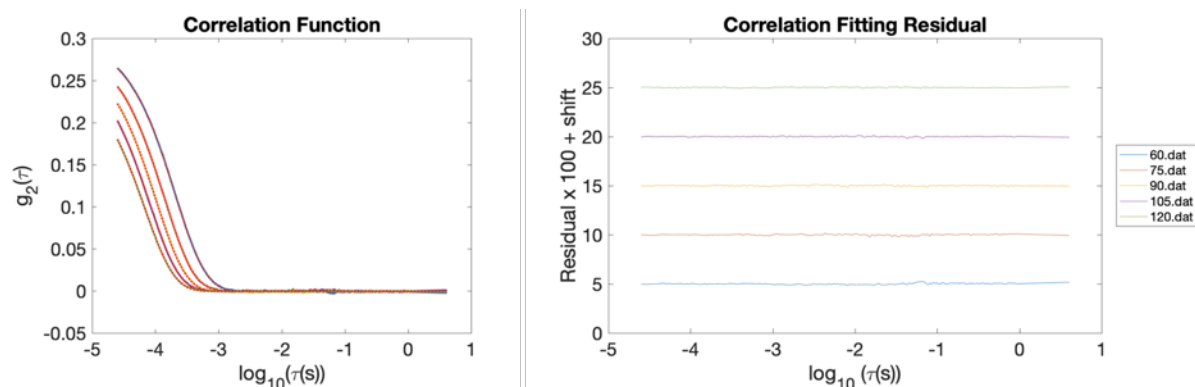

**Figure S10.** Measured angular dependence of the autocorrelation function for PEG<sub>5K</sub>-PLK<sub>47</sub> / PAA<sub>50</sub> at 0-mM NaCl between 60° and 120° fitted by cumulant expansion.

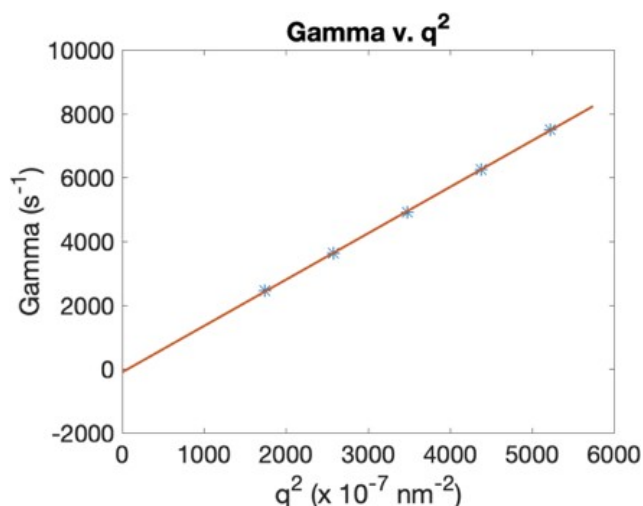

**Figure S11.** Linear regression of  $\Gamma$  vs  $q^2$  for PEG<sub>5K</sub>-PLK<sub>47</sub> / PAA<sub>50</sub> at 0-mM NaCl over 5 angles between 60° and 120°.

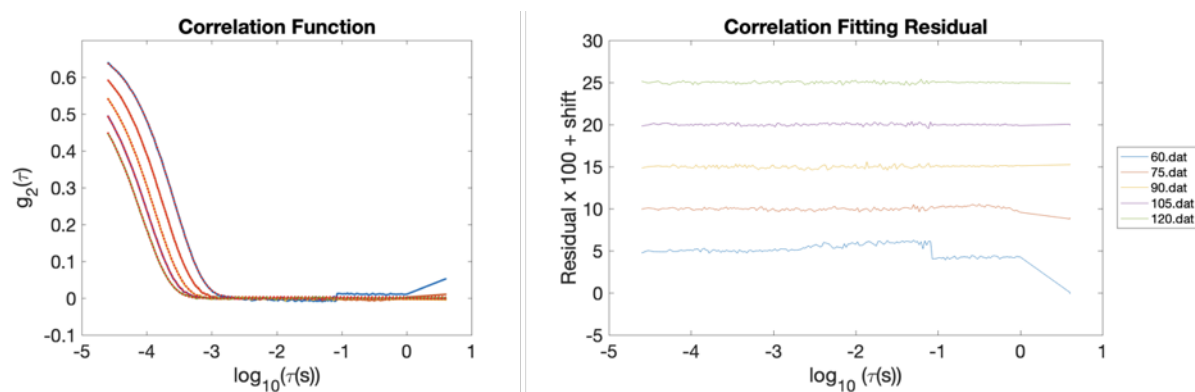

**Figure S12.** Measured angular dependence of the autocorrelation function for PEG<sub>5K</sub>-PLK<sub>47</sub> / PAA<sub>50</sub> at 100-mM NaCl between 60° and 120° fitted by cumulant expansion.

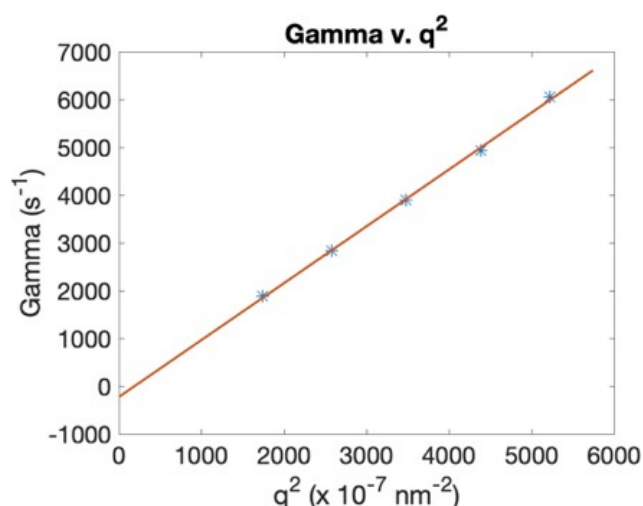

**Figure S13.** Linear regression of  $\Gamma$  vs  $q^2$  for PEG<sub>5K</sub>-PLK<sub>47</sub> / PAA<sub>50</sub> at 100-mM NaCl over 5 angles between 60° and 120°.

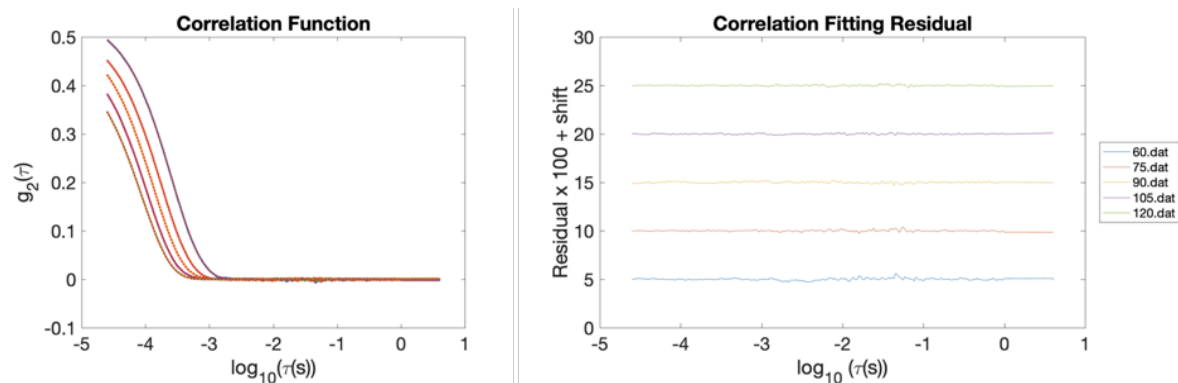

**Figure S14.** Measured angular dependence of the autocorrelation function for PEG<sub>10K</sub>-PLK<sub>93</sub> / PAA<sub>50</sub> at 0-mM NaCl between 60° and 120° fitted by cumulant expansion.

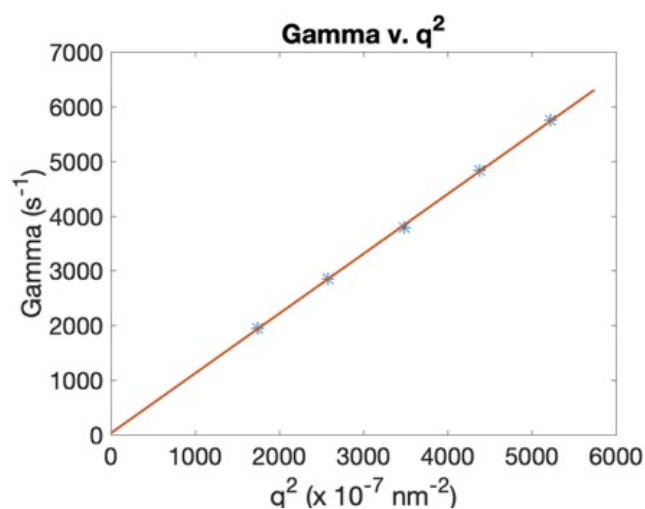

**Figure S15.** Linear regression of  $\Gamma$  vs  $q^2$  for PEG<sub>10K</sub>-PLK<sub>93</sub> / PAA<sub>50</sub> at 0-mM NaCl over 5 angles between 60° and 120°.

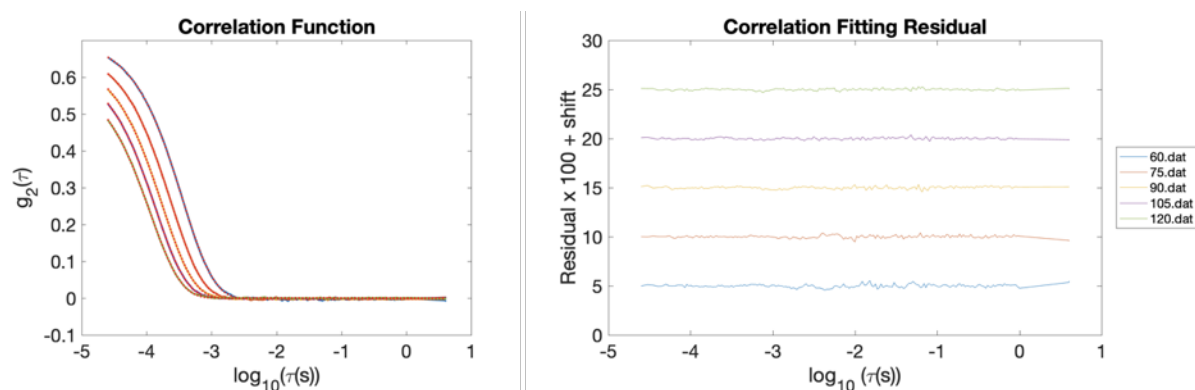

**Figure S16.** Measured angular dependence of the autocorrelation function for PEG<sub>10K</sub>-PLK<sub>93</sub> / PAA<sub>50</sub> at 100-mM NaCl between 60° and 120° fitted by cumulant expansion.

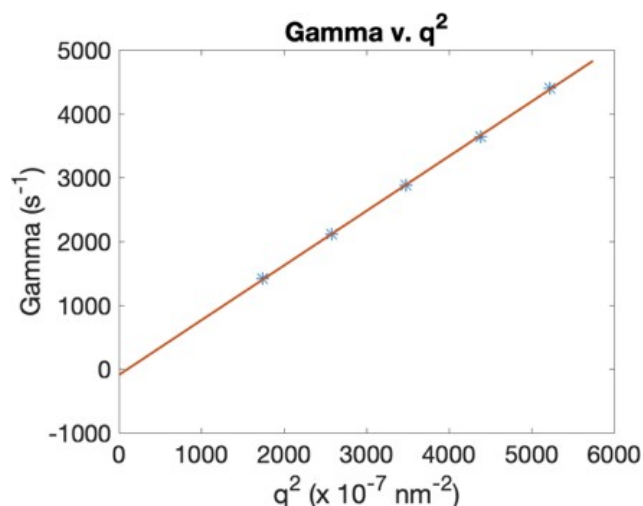

**Figure S17.** Linear regression of  $\Gamma$  vs  $q^2$  for PEG<sub>10K</sub>-PLK<sub>93</sub> / PAA<sub>50</sub> at 100-mM NaCl over 5 angles between 60° and 120°.

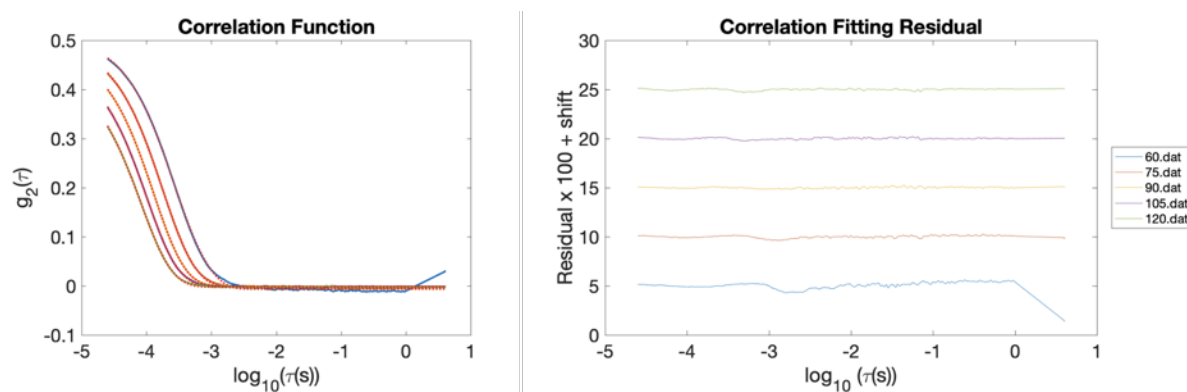

**Figure S18.** Measured angular dependence of the autocorrelation function for PEG<sub>5K</sub>-PVBTMA<sub>53</sub> / PAA<sub>50</sub> at 0-mM NaCl between 60° and 120° fitted by cumulant expansion.

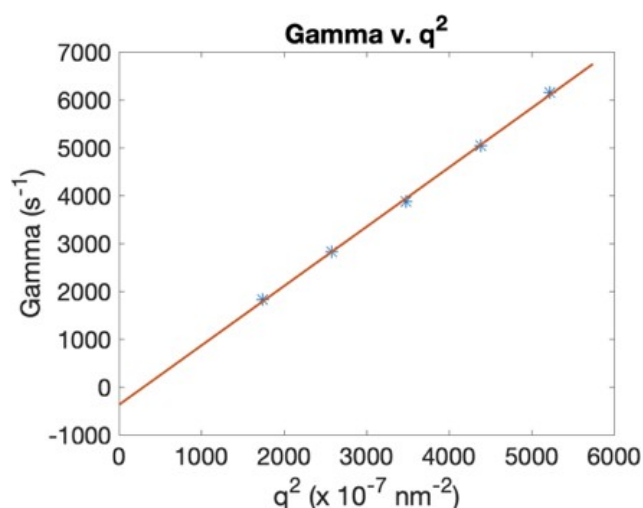

**Figure S19.** Linear regression of  $\Gamma$  vs  $q^2$  for PEG<sub>5K</sub>-PVBTMA<sub>53</sub> / PAA<sub>50</sub> at 0-mM NaCl over 5 angles between 60° and 120°.



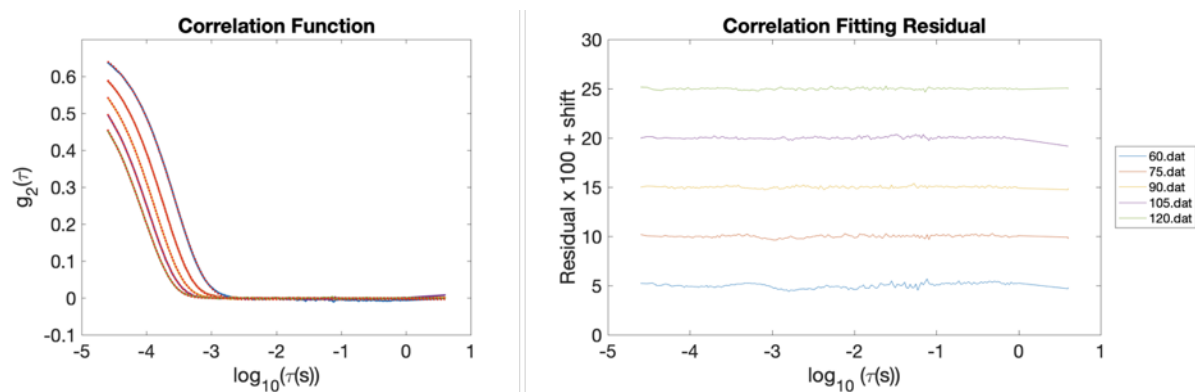

**Figure S20.** Measured angular dependence of the autocorrelation function for PEG<sub>5K</sub>-PVBTMA<sub>53</sub>/PAA<sub>50</sub> at 100-mM NaCl between 60° and 120° fitted by cumulant expansion.

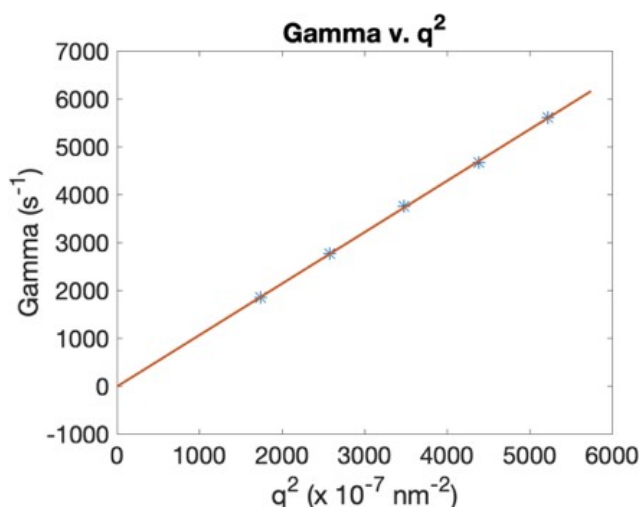

**Figure S21.** Linear regression of  $\Gamma$  vs  $q^2$  for PEG<sub>5K</sub>-PVBTMA<sub>53</sub> at 100-mM NaCl over 5 angles between 60° and 120°.

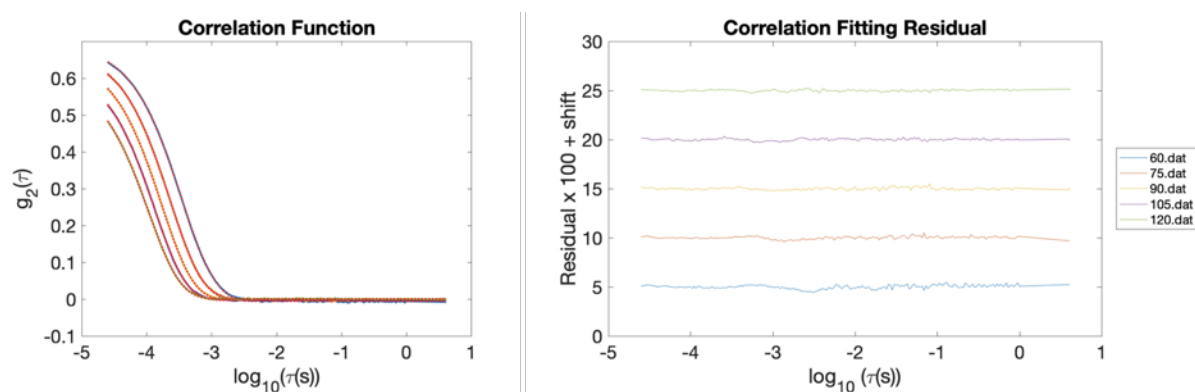

**Figure S22.** Measured angular dependence of the autocorrelation function for PEG<sub>10K</sub>-PVBTMA<sub>100</sub>/PAA<sub>50</sub> at 0-mM NaCl between 60° and 120° fitted by cumulant expansion.

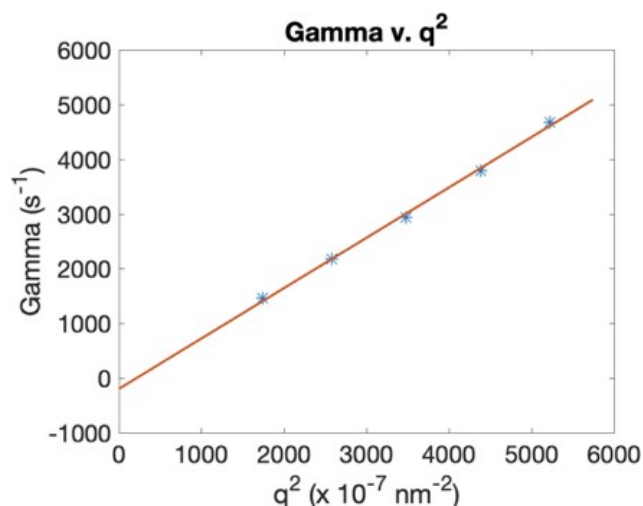

**Figure S23.** Linear regression of  $\Gamma$  vs  $q^2$  for PEG<sub>10K</sub>-PVBtMA<sub>100</sub> / PAA<sub>50</sub> at 0-mM NaCl over 5 angles between 60° and 120°.

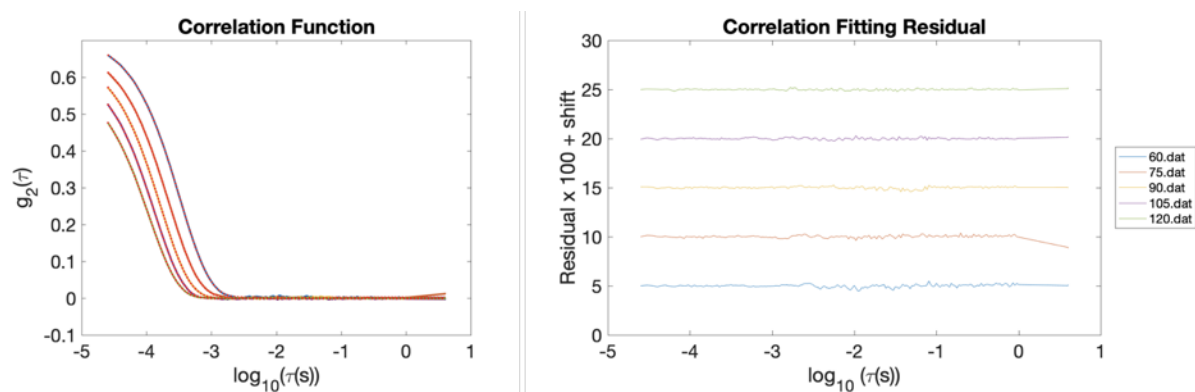

**Figure S24.** Measured angular dependence of the autocorrelation function for PEG<sub>10K</sub>- PVBtMA<sub>100</sub> / PAA<sub>50</sub> at 100-mM NaCl between 60° and 120° fitted by cumulant expansion.

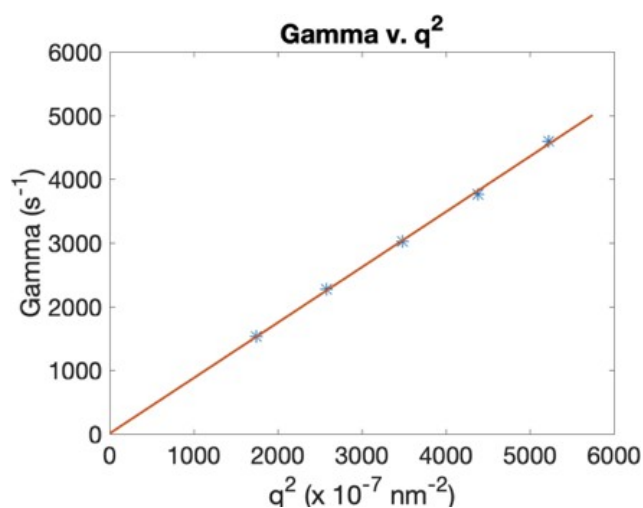

**Figure S25.** Linear regression of  $\Gamma$  vs  $q^2$  for PEG<sub>10K</sub>-PVBtMA<sub>100</sub> / PAA<sub>50</sub> at 100-mM NaCl over 5 angles between 60° and 120°.

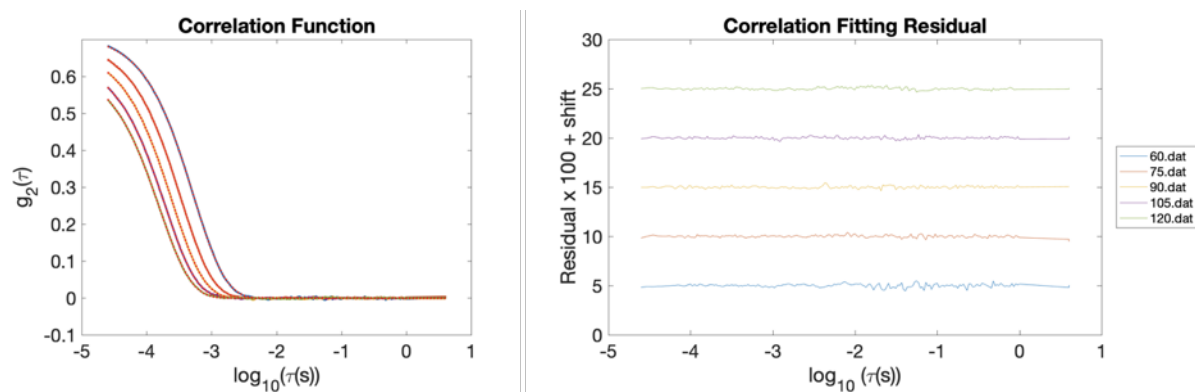

**Figure S26.** Measured angular dependence of the autocorrelation function for PMPC<sub>5K</sub>-PVBTMA<sub>50</sub> / PAA<sub>50</sub> at 0-mM NaCl between 60° and 120° fitted by cumulant expansion.

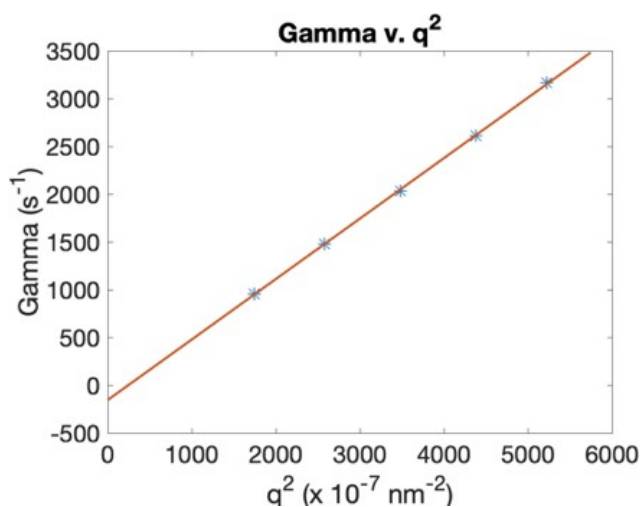

**Figure S27.** Linear regression of  $\Gamma$  vs  $q^2$  for PMPC<sub>5K</sub>-PVBTMA<sub>50</sub> / PAA<sub>50</sub> at 0-mM NaCl over 5 angles between 60° and 120°.

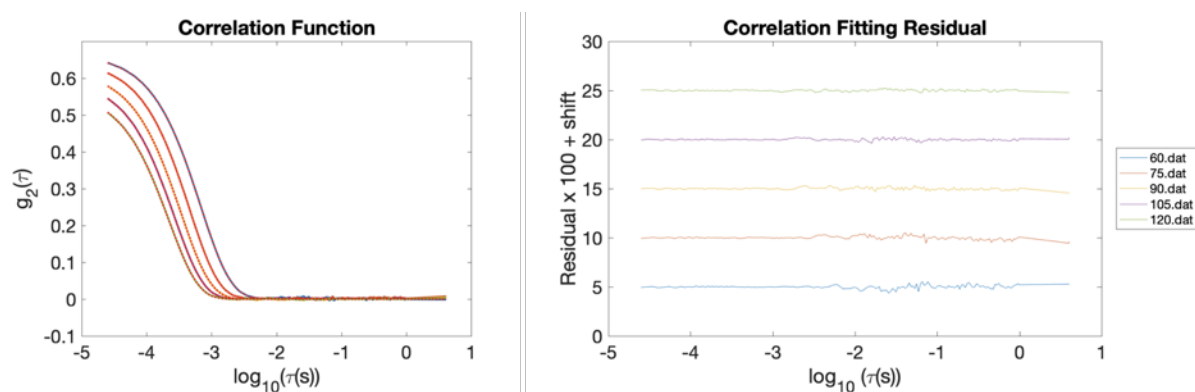

**Figure S28.** Measured angular dependence of the autocorrelation function for PMPC<sub>5K</sub>-PVBTMA<sub>50</sub> / PAA<sub>50</sub> at 100-mM NaCl between 60° and 120° fitted by cumulant expansion.

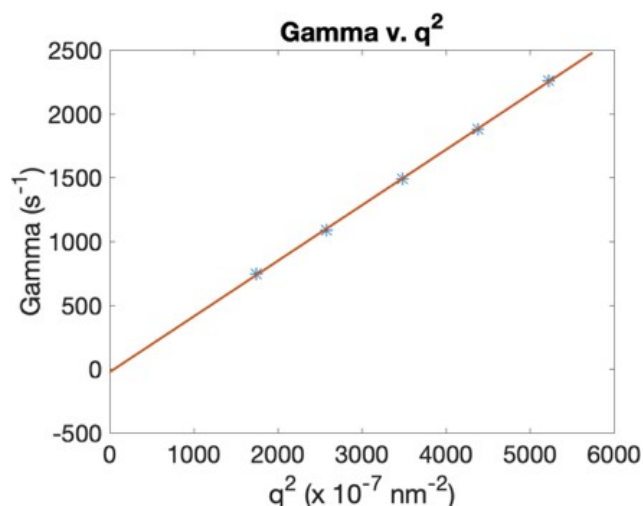

**Figure S29.** Linear regression of  $\Gamma$  vs  $q^2$  for PMPC<sub>5K</sub>-PVBTMA<sub>50</sub> / PAA<sub>50</sub> at 100-mM NaCl over 5 angles between 60° and 120°.

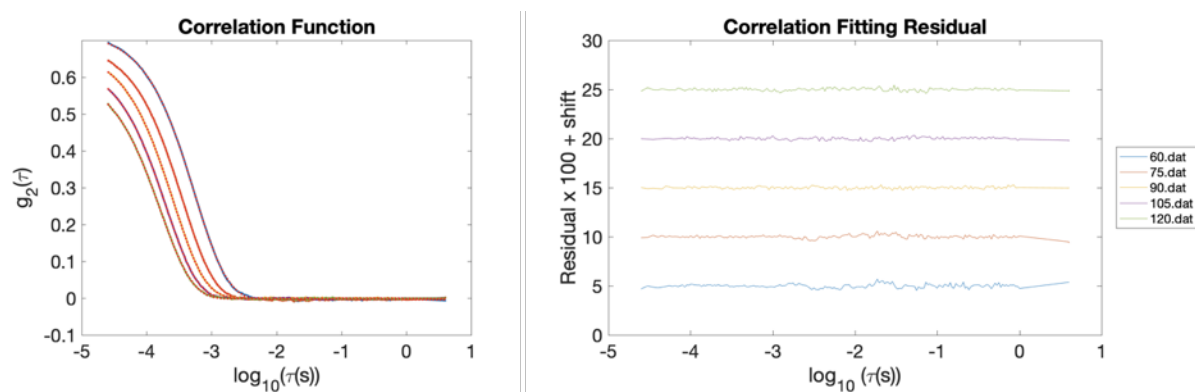

**Figure S30.** Measured angular dependence of the autocorrelation function for PMPC<sub>10K</sub>-PVBTMA<sub>97</sub> / PAA<sub>50</sub> at 0-mM NaCl between 60° and 120° fitted by cumulant expansion.

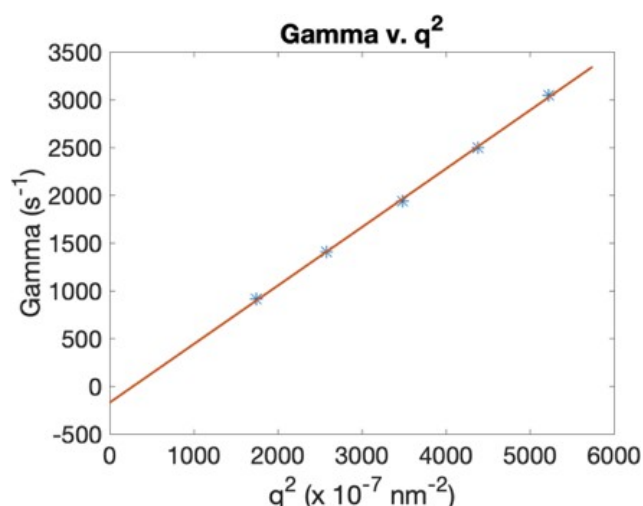

**Figure S31.** Linear regression of  $\Gamma$  vs  $q^2$  for PMPC<sub>10K</sub>-PVBTMA<sub>97</sub> / PAA<sub>50</sub> at 0-mM NaCl over 5 angles between 60° and 120°.

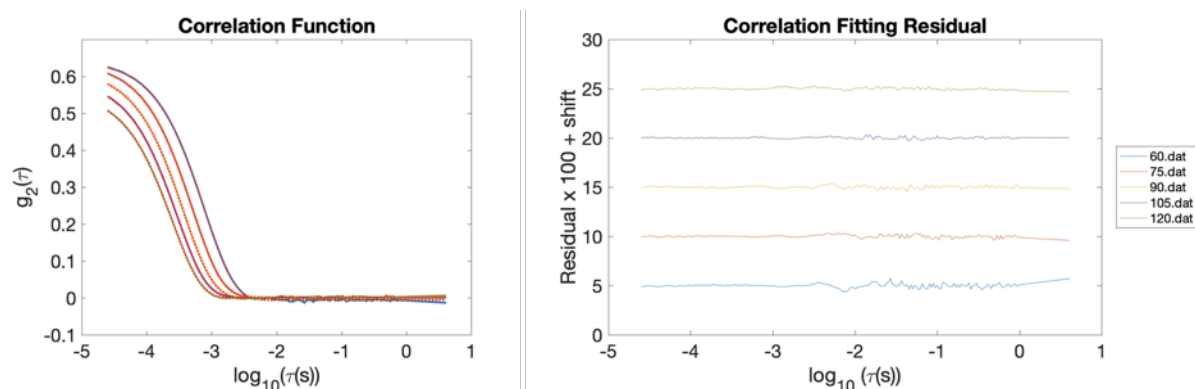

**Figure S32.** Measured angular dependence of the autocorrelation function for PMPC<sub>10K</sub>-PVBtMA<sub>97</sub> / PAA<sub>50</sub> at 100-mM NaCl between 60° and 120° fitted by cumulant expansion.

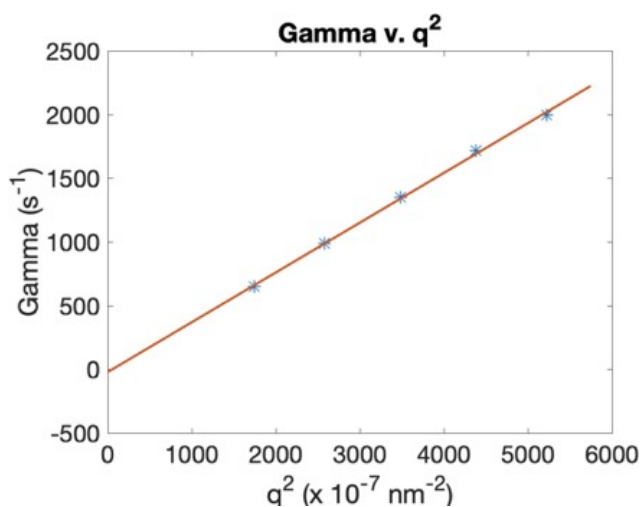

**Figure S33.** Linear regression of  $\Gamma$  vs  $q^2$  for PMPC<sub>10K</sub>-PVBtMA<sub>97</sub> / PAA<sub>50</sub> at 100-mM NaCl over 5 angles between 60° and 120°.

Figures S-34 through S-37 show the autocorrelation functions that correspond to Figure S-9 for all investigated micelle systems from 0 to 200-mM NaCl.

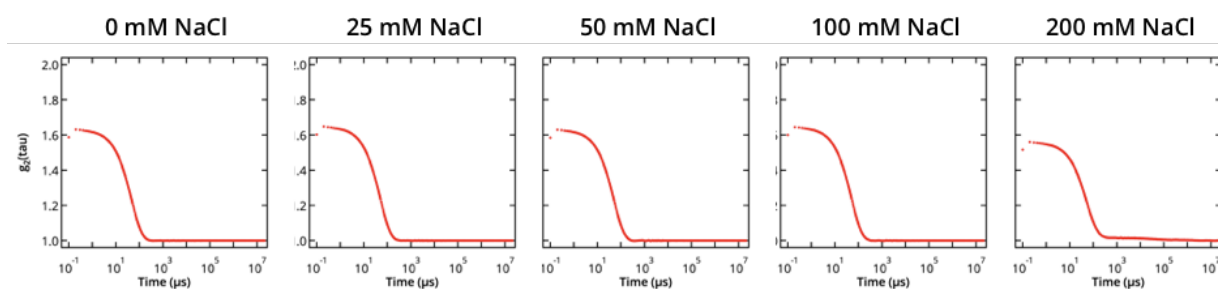

**Figure 34.** Summary of the autocorrelation functions of PCM assemblies PEG<sub>5K</sub>-PVBtMA<sub>53</sub> at 0-200 mM NaCl.

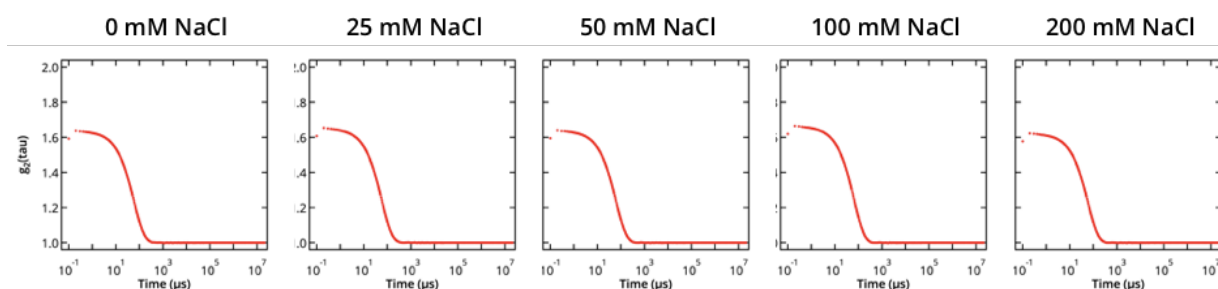

**Figure S35.** Summary of the autocorrelation functions of PCM assemblies PEG<sub>10K</sub>-PVBtMA<sub>100</sub> at 0–200 mM NaCl.

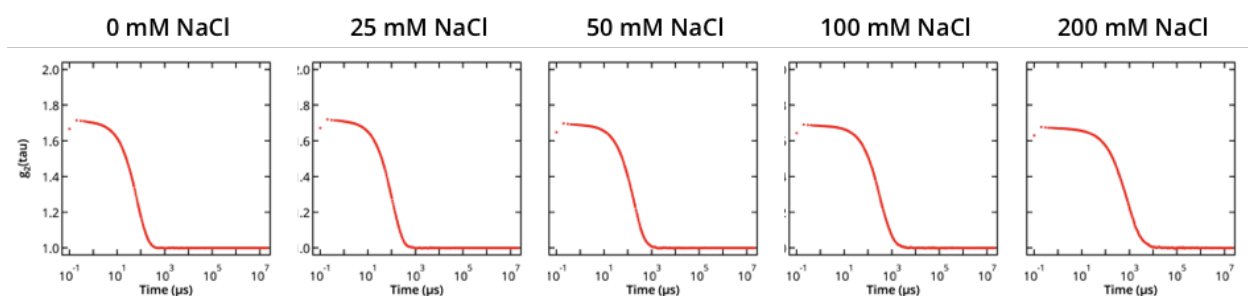

**Figure S36.** Summary of the autocorrelation functions of PCM assemblies PMPC<sub>5K</sub>-PVBtMA<sub>50</sub> at 0–200 mM NaCl.

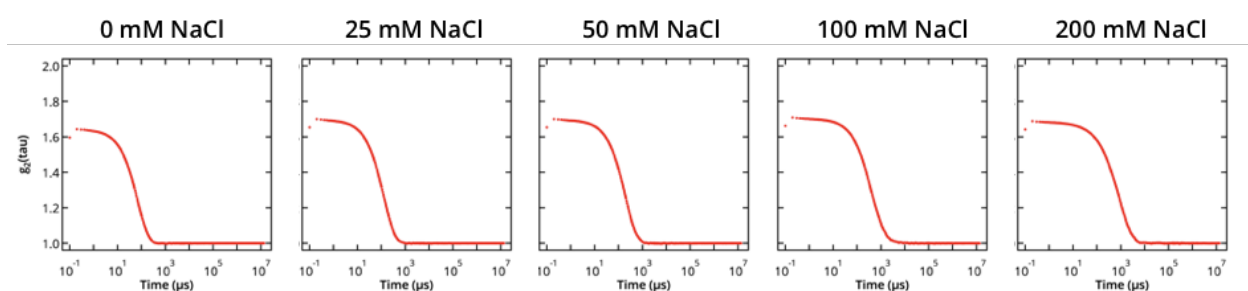

**Figure S37.** Summary of the autocorrelation functions of PCM assemblies PMPC<sub>10K</sub>-PVBtMA<sub>97</sub> at 0–200 mM NaCl.

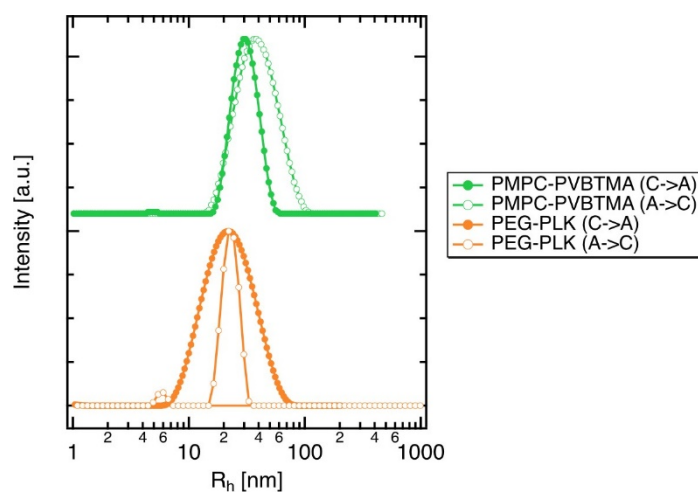

**Figure S38.** REPES fits for DLS of PCMs assembled in different orders. All micelles in this work were assembled with the cation added to the solution first, followed by the anion (C→A). When this order is reversed (A→C) the size distribution is different, suggesting that the system may be kinetically trapped.

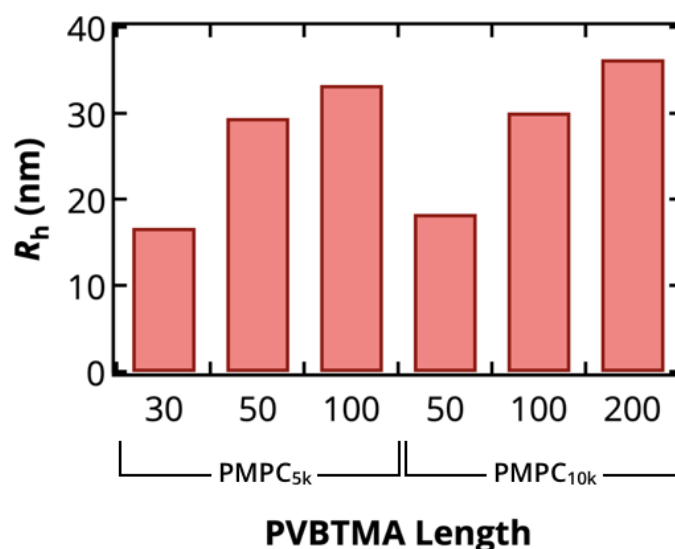

**Figure S39.** Comparison of the apparent hydrodynamic radius versus charged block length of PVBtMA in PCM assemblies.

### S3. Supplemental Small-Angle X-ray Scattering

Figure S40 shows the intensity versus  $q$  profiles of the PEG-PLK, PEG-PVBtMA and PMPC-PVBtMA polyelectrolyte solutions with increasing NaCl salt. At 0-mM NaCl, the correlation peak can be observed at  $q = 0.4\text{--}0.5 \text{ \AA}^{-1}$  for PEG-PLK and  $q = 0.2\text{--}0.4 \text{ \AA}^{-1}$  for PEG-PVBtMA and PMPC-PVBtMA. Table S-2 contains the fitting for the SAXS data in Figure 7 of the main manuscript with added  $\text{MgCl}_2$  salt.

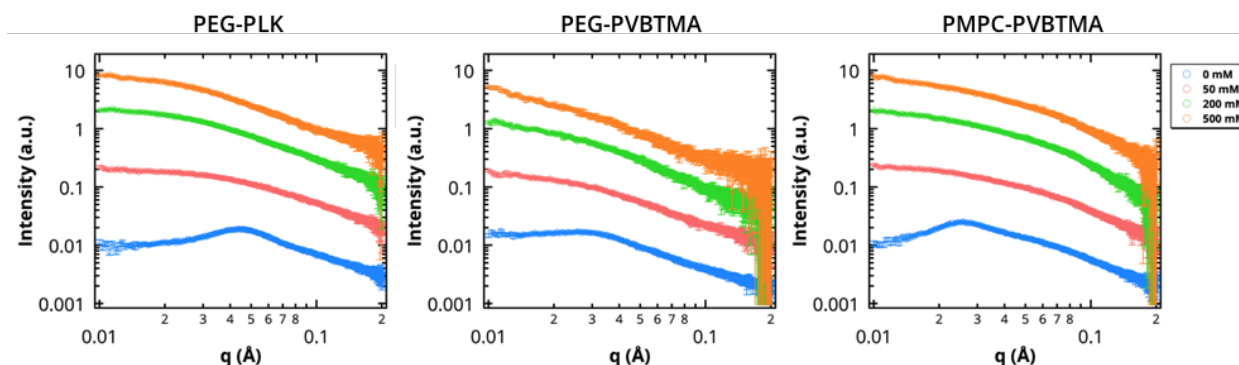

**Figure S40.** SAXS profiles of polyelectrolyte solutions of PEG-PLK, PEG-PVBtMA and PMPC-PVBtMA at polymer concentrations of 5 mg/mL with increasing added NaCl salt. Intensity scaled for clarity.

**Table S1.** SAXS summary with added  $\text{MgCl}_2$  salt.

| Sample                                                        | [ $\text{MgCl}_2$ ] (mM) | $R_{\text{Guinier}}^a$ (nm) | PDI <sup>b</sup> |
|---------------------------------------------------------------|--------------------------|-----------------------------|------------------|
| PEG <sub>5K</sub> -PLK <sub>47</sub> / PAA <sub>50</sub>      | 50                       | 8.0                         | 0.16             |
|                                                               | 100                      | 8.6                         | 0.14             |
| PEG <sub>10K</sub> -PLK <sub>93</sub> / PAA <sub>50</sub>     | 50                       | 11.2                        | 0.15             |
|                                                               | 100                      | 10.6                        | 0.09             |
| PEG <sub>5K</sub> -PVBtMA <sub>53</sub> / PAA <sub>50</sub>   | 50                       | 10.7                        | 0.09             |
|                                                               | 100                      | -                           | -                |
| PEG <sub>10K</sub> -PVBtMA <sub>100</sub> / PAA <sub>50</sub> | 50                       | 19.8                        | 0.15             |
|                                                               | 100                      | -                           | -                |
| PMPC <sub>5K</sub> -PVBtMA <sub>50</sub> / PAA <sub>50</sub>  | 50                       | -                           | -                |
|                                                               | 100                      | -                           | -                |
| PMPC <sub>10K</sub> -PVBtMA <sub>97</sub> / PAA <sub>50</sub> | 50                       | -                           | -                |
|                                                               | 100                      | -                           | -                |

<sup>a</sup> Mean radius from Guinier fit; predominately core (nm) <sup>b</sup> Polydispersity index ( $\sigma^2/R^2$ ). Models use Schulz-Zimm distribution flexible cylinder and Unified Level fits, except for PEG<sub>10K</sub>-PVBtMA<sub>47</sub> / PAA<sub>100</sub> (spheroid) and PEG<sub>10K</sub>-PLK<sub>93</sub> / PAA<sub>50</sub> (cylinder fitting).

For each polymer system, Figures S-41 through S-46 show the small angle X-ray scattering profile in water with 100, 250 and 500 mM NaCl as well as 50 and 100 mM MgCl<sub>2</sub>.

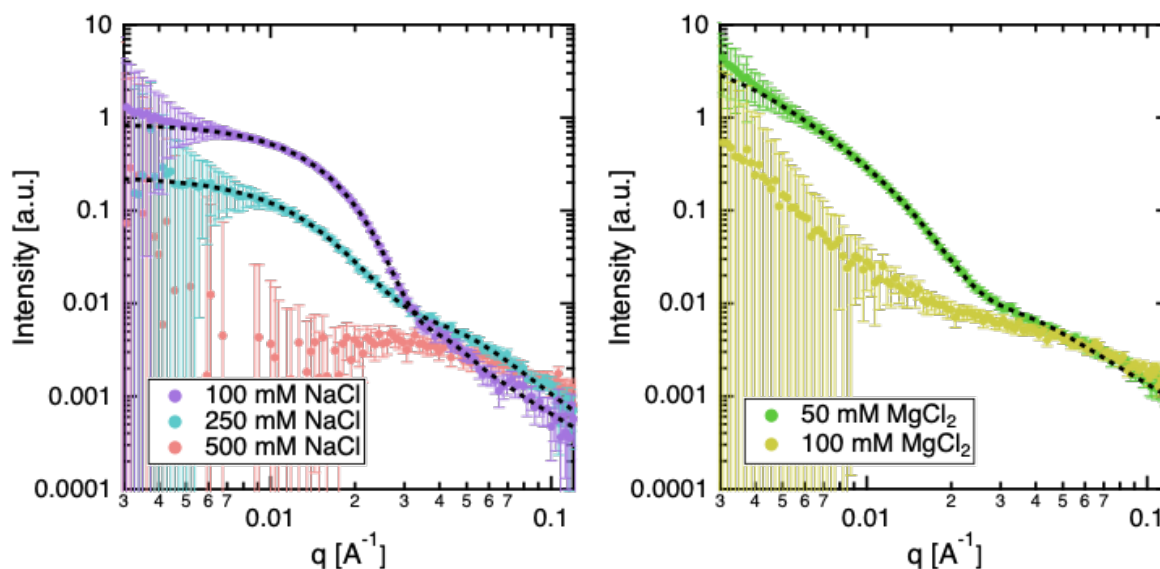

**Figure S41.** SAXS profiles for PEG<sub>5K</sub>-PVBtMA<sub>53</sub> / PAA<sub>50</sub> with 100, 250 and 500-mM NaCl (left), as well as 50 and 100-mM MgCl<sub>2</sub> (right).

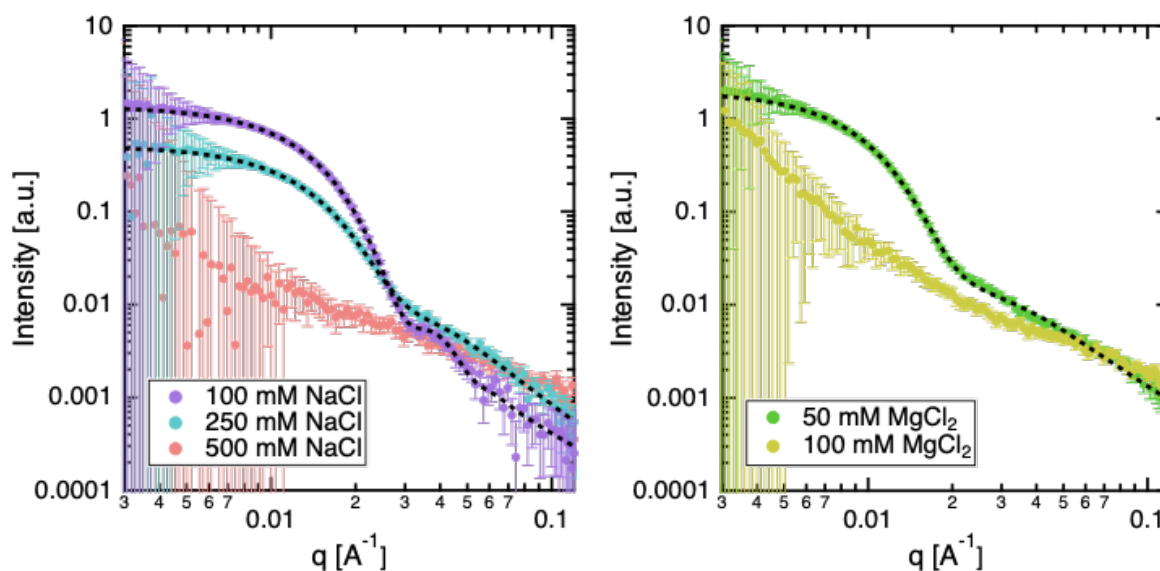

**Figure S42.** SAXS profiles for PEG<sub>10K</sub>-PVBtMA<sub>100</sub> / PAA<sub>50</sub> with 100, 250 and 500-mM NaCl (left), as well as 50 and 100-mM MgCl<sub>2</sub> (right).



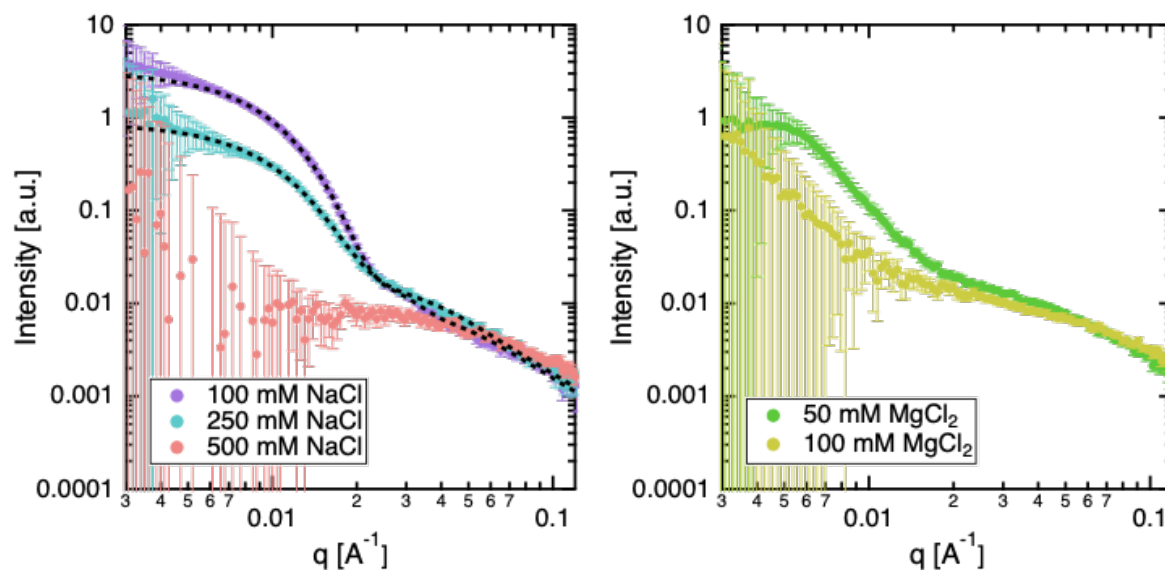

**Figure S43.** SAXS profiles for PMPC<sub>5K</sub>-PVBTMA<sub>50</sub> / PAA<sub>50</sub> with 100, 250 and 500-mM NaCl (left), as well as 50 and 100-mM MgCl<sub>2</sub> (right).

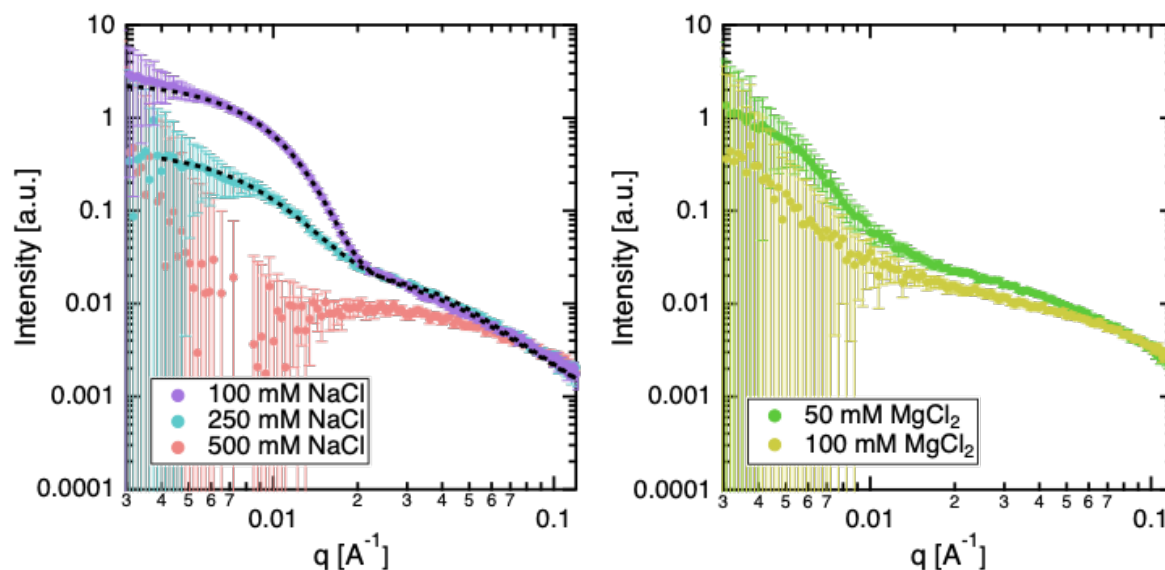

**Figure S44.** SAXS profiles for PMPC<sub>10K</sub>-PVBTMA<sub>97</sub> / PAA<sub>50</sub> with 100, 250 and 500-mM NaCl (left), as well as 50 and 100-mM MgCl<sub>2</sub> (right).

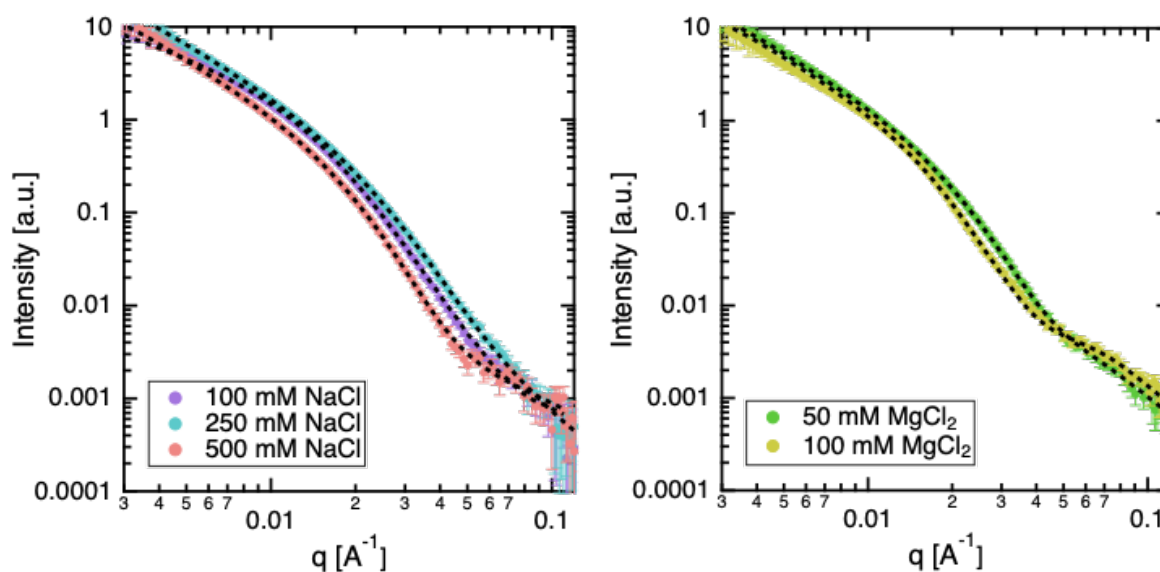

**Figure S45.** SAXS profiles for PEG<sub>5K</sub>-PLK<sub>47</sub> / PAA<sub>50</sub> with 100, 250 and 500-mM NaCl (left), as well as 50 and 100-mM MgCl<sub>2</sub> (right).

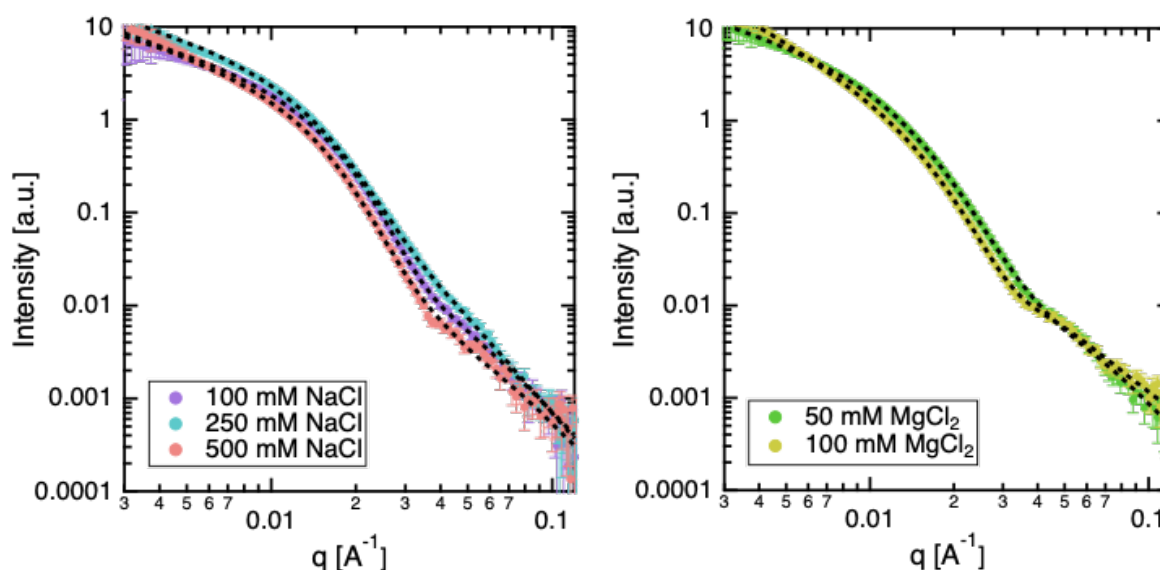

**Figure S46.** SAXS profiles for PEG<sub>10K</sub>-PLK<sub>93</sub> / PAA<sub>50</sub> with 100, 250 and 500-mM NaCl (left), as well as 50 and 100-mM MgCl<sub>2</sub> (right).

#### S4. Supplemental Polyelectrolyte Complex Micelle Stability Data

Kinetic stability tests of the micelles were examined in FBS. Figure S46 shows the apparent size distribution of PEG-PVBtMA and PMPC-PVBtMA at 1 and 10 h, repeated three times independently. The overall size distribution of particles appears to be consistent, with evidence of PMPC-PVBtMA micelle aggregation over time.

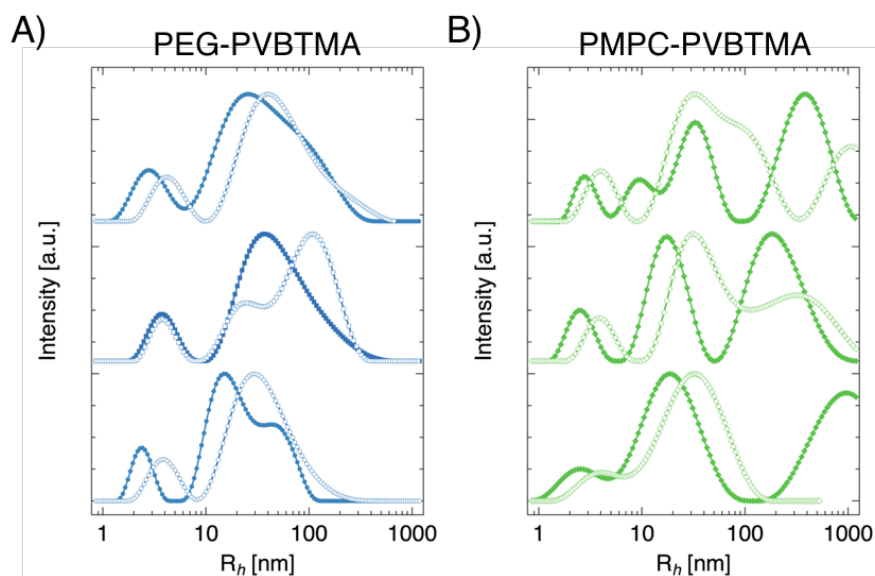

**Figure S47.** Three replicates of the apparent size hydrodynamic radius distribution of PEG- PVBTMA and PMPC-PVBTMA micelles at 1 h (solid markers) and 10 h (open markers), analyzed by REPES analysis at the 90° angle. Intensity is scaled for clarity.
